# Supplementary material for: Hyperbranched polyethylenimine bearing cyclodextrin moieties showing temperature and pH controlled dye release
Source: publisher site journal article supplement (doi:10.3762/bjoc.7.130), 2011-08-18
Supplement: Additional file 1 [file 1860-5397-7-130-S1.pdf]

# Supporting Information

for

## **Hyperbranched polyethylenimine bearing cyclodextrin moieties showing temperature and pH controlled dye release**

Indra Böhm<sup>‡</sup>, Susanne Katharina Kreth<sup>‡</sup>, Helmut Ritter<sup>\*‡</sup>

Address: Institut für Organische und Makromolekulare Chemie II, Heinrich-Heine-Universität  
Düsseldorf, Universitätsstraße 1, D-40225 Düsseldorf, Germany Fax: (+49) 211 8115840

Email: Helmut Ritter\* - h.ritter@uni-duesseldorf.de

\*Corresponding author

<sup>‡</sup>Equal contributors

## **Experimental details**

### Synthesis of cyclodextrin modified hyperbranched PEI 3

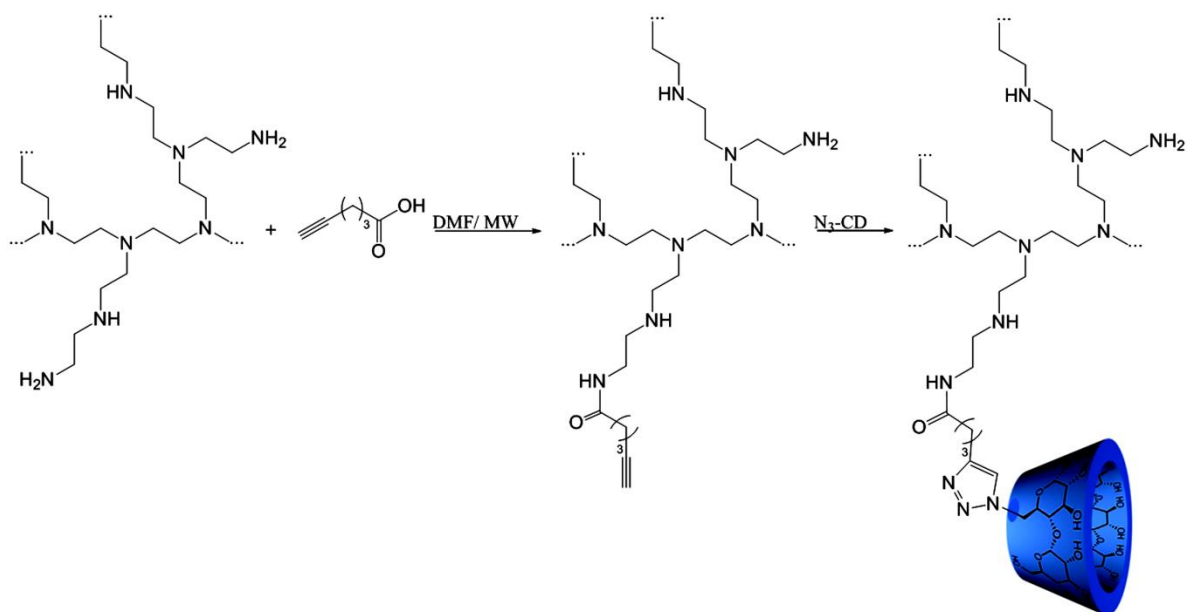

**Scheme S1:** Synthesis of **3**

Commercially available hyperbranched PEI ( $M_w = 10,000$  g/mol) was employed. The polymer-analogous amidation with 5-hexynoic acid was implemented under microwave conditions. A solution of 5-hexynoic acid (1 g, 0.89 mmol) and PEI (1.12 g) in 8 mL DMF was added to a pressure-resistant test tube. The tube was sealed and placed in the CEM monomode microwave and irradiated at 85 °C and 60 W for 30 min. The subsequent reaction was implemented, without isolation of the intermediate, by adding sodium ascorbate (36 mg, 0.02 mmol), copper(II) sulfate pentahydrate (14 mg, 0.01 mmol) and mono-(6-azido-6-deoxy)- $\beta$ -cyclodextrin (2.12 g, 0.18 mmol) to the solution. The tube was sealed and placed again in the CEM monomode microwave and irradiated at 85 °C and 60 W for 60 min. The product PEI-CD **1** was precipitated with acetone (100 mL) and dialyzed (MWCO 3500) to separate the polymer **1** from the catalysts and the monomers. The product was freeze-dried to afford 92% of pure product as a brownish powder.

**3**: UV (water):  $\lambda_{\max}$  ( $\epsilon$ ) = 300 nm ( $1200 \text{ L}\cdot\text{mol}^{-1}\cdot\text{cm}^{-1}$ );  $^1\text{H}$  NMR ( $\text{DMSO}-d_6$ ):  $\delta$  = 0.83–0.84 (8H,  $-\text{CH}_2-$ ), 0.93 (3H,  $\text{C}\equiv\text{CH}$ ), 1.13–1.27 (12H,  $-\text{CH}_2-$ ), 1.35–1.41 (4H,  $-\text{CH}_2-$ ), 1.46 (8H,  $-\text{CH}_2-$ ), 1.62–1.65 (4H,

-CH<sub>2</sub>-), 1.78–1.81 (8H, -CH<sub>2</sub>-), 1.35–1.41 (4H, -CH<sub>2</sub>-), 2.05–2.08 (16H, -CH<sub>2</sub>-), 2.10–2.17 (16H, -CH<sub>2</sub>-), 2.22–2.25 (8H, -CH<sub>2</sub>-), 2.33–2.35 (8H, -CH<sub>2</sub>-), 2.78 (12H, -CH<sub>2</sub>-), 2.80 (4H, -CH<sub>2</sub>-), 2.93 (12H, -CH<sub>2</sub>-), 3.34 (14H, H-2, 4), 3.56–3.63 (br, 28H, H-3, 5, 6), 4.49 (br, 6H, OH-6), 4.82 (d, 7H, H-1), 5.76 (14H, OH-2, 3), 7.79 (1H, -CH-), 8.02 (1H, -NH); IR: 3 304 (OH), 2 927 (CH), 2 825 (CH), 1 651 (Amid I), 1 546 (Amid II), 1 401 (OH), 1 151 (CN), 1 079 (OH), 1 028 (CH), 939, 853, 753 (NH), 703 (CH) cm<sup>-1</sup>; Elemental analysis: C 50.32, H 7.84, N 10.93%.

### Synthesis of dye 2

3.62 mmol of the 1,4-dichloroanthraquinone (synthesized according to literature procedure [1]), 1.71 g (11.3 mmol) adamantylamine and 1.18 g (8.31 mmol) disodium hydrogen phosphate were suspended in 4 mL *N*-methylpyrrolidone and heated to 180 °C for 12 h. The reaction mixture was poured into 100 mL of water and filtered off. Drying at 60 °C for 24 h gave the corresponding dye in a yield of 60 %.

**2:** UV/Vis (chloroform):  $\lambda_{\max}$  ( $\epsilon$ ) = 524 nm; IR: 2 905, 2 848  $\nu(\text{C-H})_{\text{adamantyl}}$ , 1 706  $\nu(\text{C=O})$ , 1 598  $\nu(\text{C=O})_{\text{anthraquinone}}$ , 1 516  $\delta(\text{N-H})$ , 1 452  $\delta(\text{C-H})_{\text{asym}}$ , 1 306  $\delta(\text{C-H})_{\text{sym}}$ , 810  $\nu(\text{C-H})_{\text{aromatic}}$  out-of-plane deformation vibrations (2 neighbouring H atoms), 721  $\nu(\text{C-H})_{\text{aromatic}}$  out-of-plane deformation vibrations (4 neighbouring H atoms) cm<sup>-1</sup>; <sup>1</sup>H-NMR (CDCl<sub>3</sub>):  $\delta$  = 8.14 (m, 2H, H1 ), 7.65 (m, 2H, H2), 7.31 (m, 2H, H3), 1.70 and 2.11 (m, 15H, adamantyl) ppm; MS (EI):  $m/z$  = 506 ([M]<sup>+</sup>).

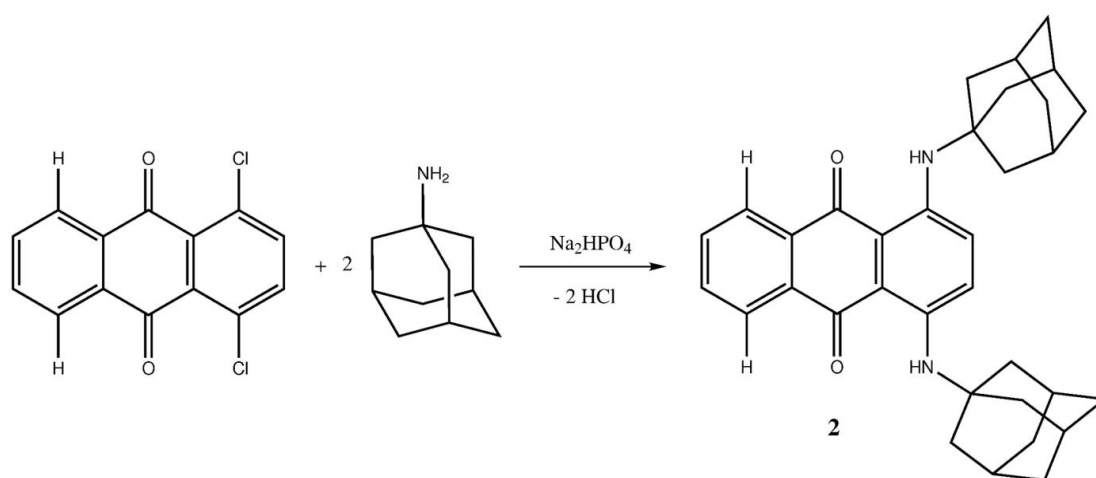

**Scheme S2:** Synthesis of adamantyl-containing dyes 2

**DLS of salt 4, PEI with 1, complex 5, compound 3 and RAMEB-CD with 2**

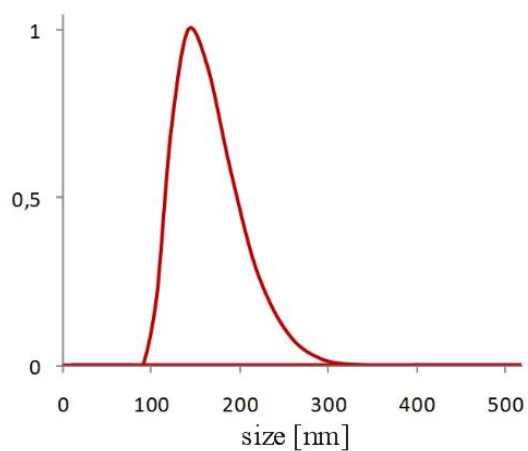

**Figure S1:**  $d_H$  of salt **4** (compound **3** with a  $d_H$  of 8 nm was combined with dye **1** leading to a  $d_H$  of 163 nm) ( $C_p=0.5$  g/L, in  $H_2O$ , pH 7, 25°C).

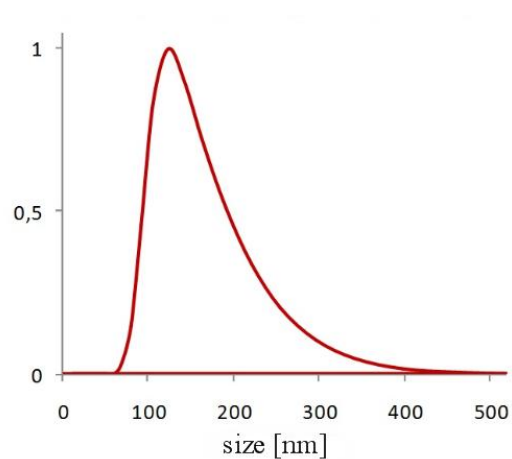

**Figure S2:** Unmodified PEI with a  $d_H$  of 4 nm was combined with dye **1** leading to a  $d_H$  of 152 nm ( $C_p=0.5$  g/L, in  $H_2O$ , pH 7, 25°C).

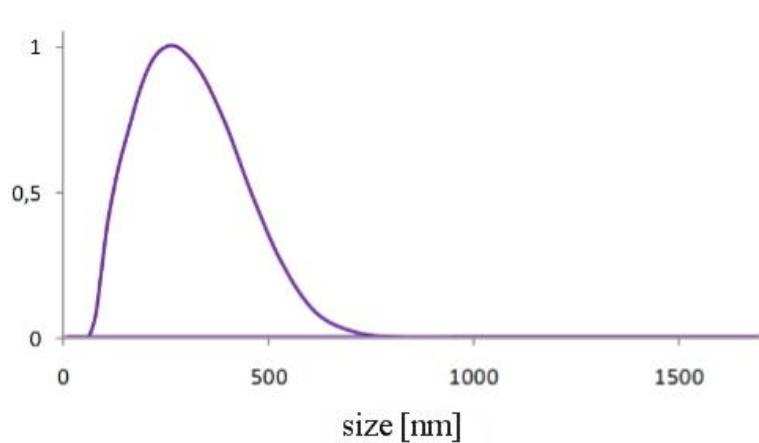

**Figure S3:**  $d_H$  of complex **5** (compound **3** with a  $d_H$  from 8 nm was combined with dye **2** leading to a  $d_H$  260 nm) ( $C_p= 0.5$  g/L, in  $H_2O$ , pH 7, 25°C).

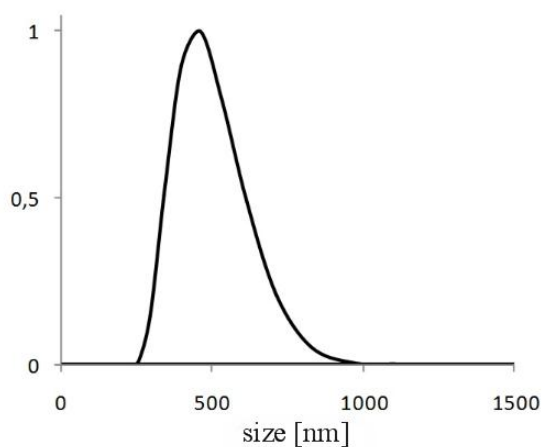

**Figure S4:**  $d_H$  of complex **6** ( $d_H$  of 480 nm which verifies an inclusion of both dyes (**1** and **2**)) ( $C_p= 0.5$  g/L, in  $H_2O$ , pH 7, 25°C).

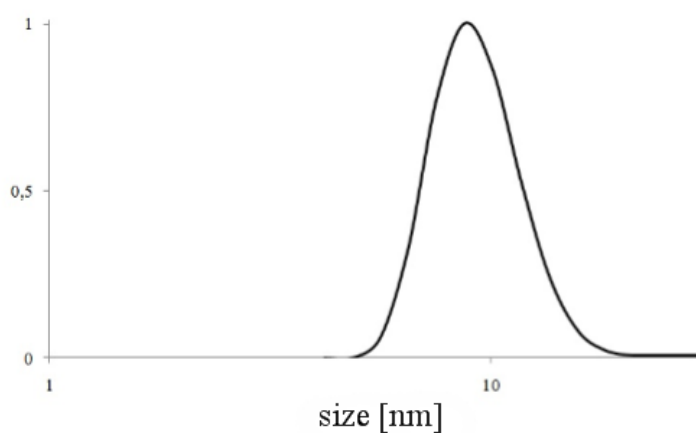

**Figure S5:**  $d_H$  of compound **3** ( $C_p= 0.5$  g/L, in  $H_2O$ , pH 7, 25°C).

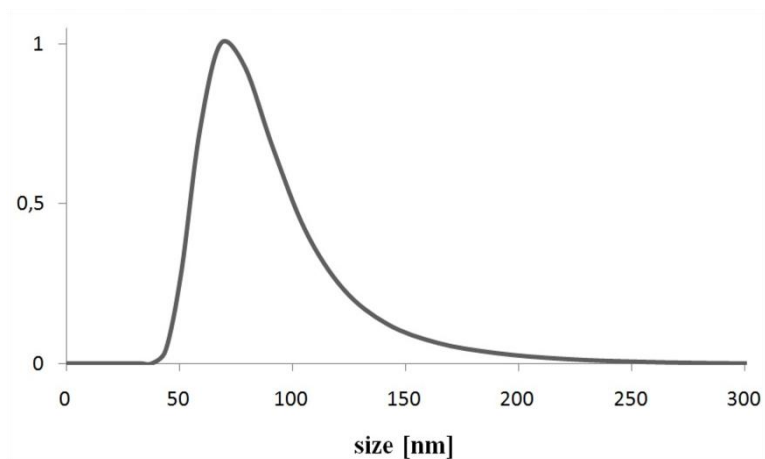

**Figure S6:** DLS measurements of RAMEB-CD and dye **2** showing a  $d_H$  of 68 nm ( $C_p=0.5$  g/L, in  $H_2O$ , pH 7, 25°C).

### UV-vis spectra and photo of complex **5**

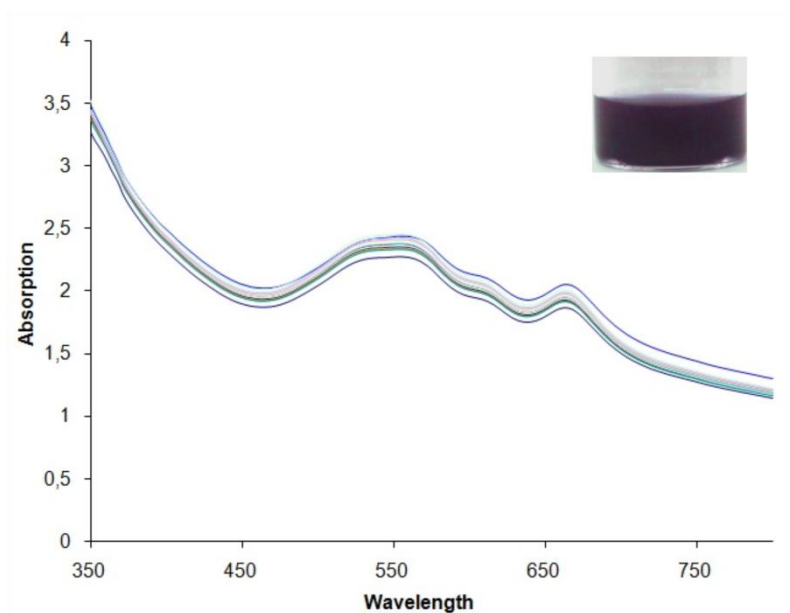

**Figure S7:** UV/Vis spectra and photo of complex **5** in solution (pH 1–14 at day 1) showing no sensitivity to pH change.

[1] Schönhagen, H.; Schmitz, R. Process for the preparation of 1,4-dichloroanthraquinone. DE3513981A1, October 30, 1986.
